# Supplementary material for: Stable Isotope Analysis Challenges Wasp-Waist Food Web Assumptions in an Upwelling Pelagic Ecosystem
Source: PubMed Central journal article supplement — Sci Rep. 2012 Sep 13;2:654. doi: 10.1038/srep00654 (PMC3440624; doi:10.1038/srep00654), 2012-09-13
Supplement: srep00654-s1.pdf [file srep00654-s1.pdf]

## Supplementary Information

### Stable Isotope Analysis Challenges Wasp-Waist Food Web Assumptions in an Upwelling Pelagic Ecosystem

Daniel J. Madigan<sup>1\*</sup>, Aaron B. Carlisle<sup>1</sup>, Heidi Dewar<sup>2</sup>, Owyn E. Snodgrass<sup>2</sup>, Steven Y. Litvin<sup>3</sup>, Fiorenza Micheli<sup>3</sup> and Barbara A. Block<sup>1</sup>

<sup>1</sup>Tuna Research and Conservation Center of Hopkins Marine Station, Stanford University, Pacific Grove, CA 93950

<sup>2</sup>NOAA Southwest Fisheries Science Center, Fisheries Research Division, La Jolla, CA 92037

<sup>3</sup>Hopkins Marine Station, Stanford University, Pacific Grove, CA 93950

\*Corresponding author. E-mail: dmadigan@stanford.edu

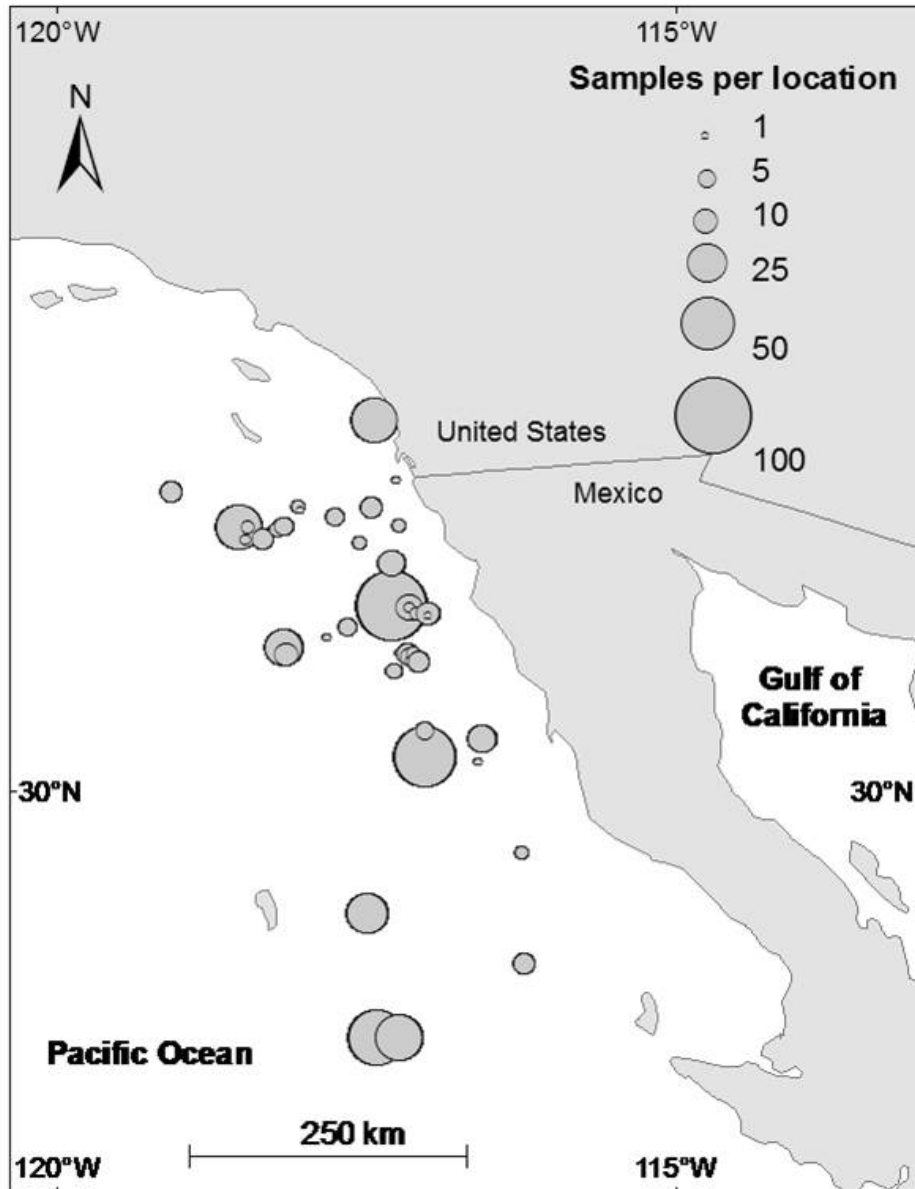

**Supplementary Figure S1.** Map of the study area showing sampling effort off southern California, USA and northern Baja, Mexico. Sampling occurred from April - October between 2007 and 2010. Markers at each sampling location (●) are scaled according to number of samples taken at that location.

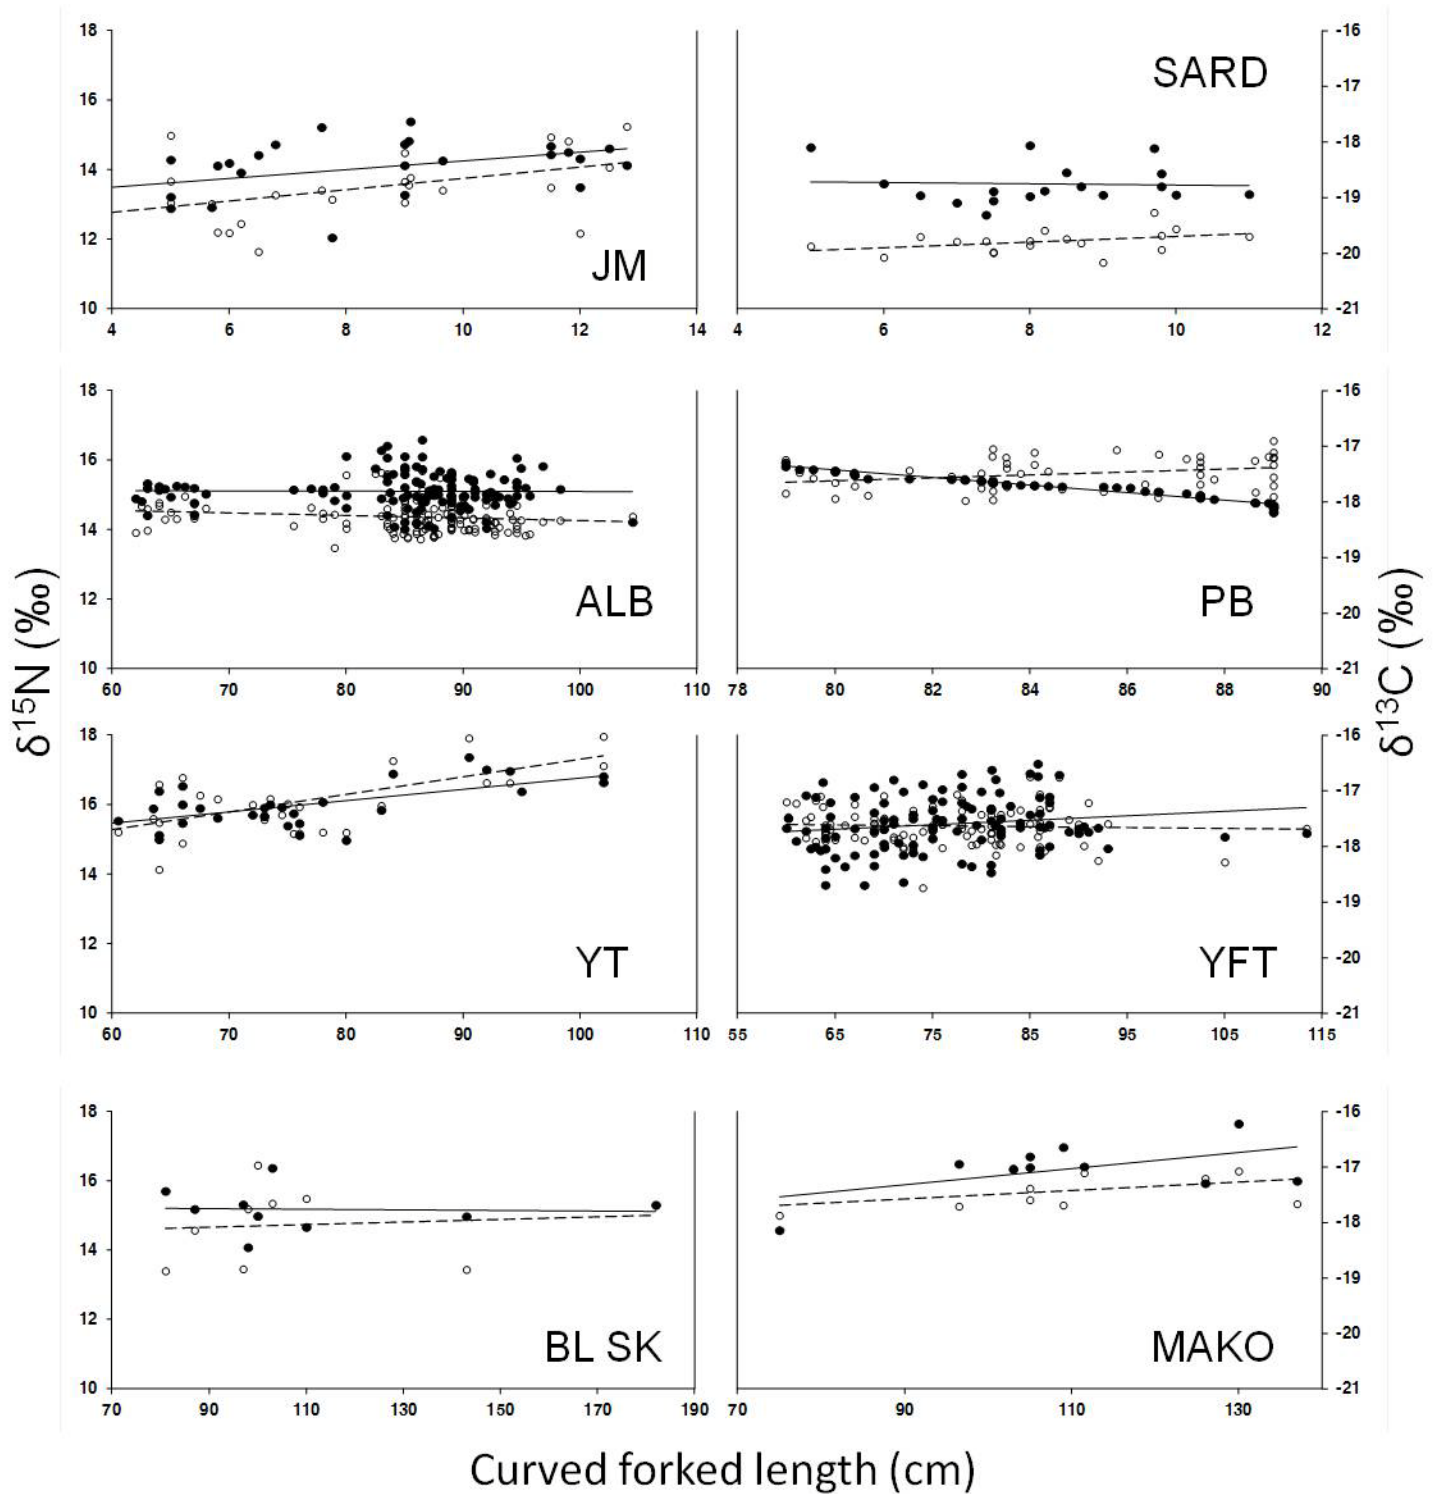

**Supplementary Figure S2.** Biplots showing relationship between body length and  $\delta^{13}\text{C}$  ( $\circ$ ) and  $\delta^{15}\text{N}$  ( $\bullet$ ) values for eight southern California Current residents (SARD (*S. sagax*), JM (*T. symmetricus*), ALB (*T. alalunga*), PB (*T. orientalis*), YFT (*T. albacares*), YT (*S. lalandi*), BLSK (*P. glauca*), SWD (*X. oxyrinchus*)). Scale for y-axes ( $\delta^{13}\text{C}$  and  $\delta^{15}\text{N}$ ) is the same for all species. Linear fits shown for body length v.  $\delta^{15}\text{N}$  (—) and  $\delta^{13}\text{C}$  (- -) values.

**Supplementary Table S1.** Linear fits of size versus isotope values in eight species in the CCLME (SARD (*S. sagax*), JM (*T. symmetricus*), ALB (*T. alalunga*), PB (*T. orientalis*), YFT (*T. albacares*), YT (*S. lalandi*), BLSK (*P. glauca*), SWD (*X. oxyrinchus*)).  $r^2$  values for each fit to  $\delta^{13}\text{C}$  and  $\delta^{15}\text{N}$  shown for each species. Statistically significant correlations of size and isotope values at the  $\alpha = 0.05$  level shown in bold.

| Species | $\delta^{15}\text{N}$ |                   | $\delta^{13}\text{C}$ |                   |
|---------|-----------------------|-------------------|-----------------------|-------------------|
|         | $r^2$                 | P-value           | $r^2$                 | P-value           |
| JM      | 0.464                 | <b>0.015</b>      | 0.514                 | <b>0.006</b>      |
| SARD    | 0.054                 | 0.830             | 0.389                 | 0.111             |
| ALB     | -0.005                | 0.961             | -0.146                | 0.110             |
| PB      | -0.974                | <b>&lt;0.0001</b> | 0.289                 | <b>0.034</b>      |
| YT      | 0.670                 | <b>&lt;0.0001</b> | 0.708                 | <b>&lt;0.0001</b> |
| YFT     | 0.164                 | 0.089             | -0.046                | 0.634             |
| BLSK    | -0.044                | 0.901             | -0.295                | 0.441             |
| MAKO    | 0.528                 | 0.117             | 0.131                 | 0.718             |

**Supplementary Table S2.** Estimated proportional prey inputs from Bayesian isotope mixing model (MixSir) of trophic groups (TG) to diets of nine predator species and to diets of trophic groups as a whole (TG3-5). Values reported are for  $1 \times 10^7$  iterations and uninformative priors [1 1 1 1]. Species and TGs marked in bold with an asterisk showed bimodal solutions. TG input estimate values that were bimodal for these species are shown in bold.

|                              |                                                           | Estimated proportional prey inputs<br>Uninformative priors [1 1 1 1] |               |                 |               |                 |               |                 |        |
|------------------------------|-----------------------------------------------------------|----------------------------------------------------------------------|---------------|-----------------|---------------|-----------------|---------------|-----------------|--------|
|                              |                                                           | Trophic Group 2                                                      |               | Trophic Group 3 |               | Trophic Group 4 |               | Trophic Group 5 |        |
| Species                      | Code                                                      | Median                                                               | 95% CI        | Median          | 95% CI        | Median          | 95% CI        | Median          | 95% CI |
| <i>S. japonicus</i>          | PM                                                        | 91                                                                   | 84 – 97       | 3               | 0 – 11        | 2               | 0 – 8         | 2               | 0 – 6  |
| <i>P. glauca</i>             | BLSK                                                      | 77                                                                   | 64 – 87       | 9               | 1 – 28        | 6               | 1 – 19        | 4               | 0 – 13 |
| <i>T. alalunga</i>           | ALB                                                       | 77                                                                   | 72 – 80       | 6               | 1 – 16        | 16              | 8 – 21        | 1               | 0 – 4  |
| <i>T. orientalis</i>         | PB                                                        | 44                                                                   | 37 – 51       | 28              | 17 – 40       | 18              | 7 – 28        | 10              | 2 – 18 |
| <i>T. albacares</i>          | YFT                                                       | 54                                                                   | 50 – 58       | 2               | 0 – 6         | 42              | 31 – 47       | 2               | 0 – 9  |
| <b><i>S. chiliensis</i>*</b> | <b>BON</b>                                                | <b>35</b>                                                            | <b>6 – 49</b> | <b>9</b>        | <b>0 – 75</b> | <b>47</b>       | <b>6 – 62</b> | 2               | 0 – 9  |
| <b><i>S. lalandi</i>*</b>    | <b>YT</b>                                                 | <b>4</b>                                                             | <b>0 – 30</b> | <b>74</b>       | <b>3 – 84</b> | <b>15</b>       | <b>2 – 65</b> | 6               | 0 – 17 |
| <i>X. gladius</i>            | SWD                                                       | 1                                                                    | 0 – 4         | 96              | 92 – 99       | 1               | 0 – 4         | 1               | 0 – 3  |
| <i>I. oxyrinchus</i>         | MAKO                                                      | 5                                                                    | 0 – 16        | 84              | 69 – 94       | 5               | 0 – 17        | 4               | 0 – 13 |
| Trophic Group (TG)           |                                                           |                                                                      |               |                 |               |                 |               |                 |        |
| 5*                           | MAKO, YT, SWD, BON, YFT, PB, STM, LOL, DG                 | 59                                                                   | 21 – 62       | 5               | 1 – 66        | 4               | 0 – 12        | 31              | 4 – 36 |
| 4                            | BLSK, ABRL, SLB, ALB, FM, OPA, PM, ONYC                   | 82                                                                   | 76 – 87       | 11              | 2 – 21        | 5               | 1 – 12        | 2               | 0 – 6  |
| 3                            | SARD, EELPT, JM, SEB, ARGO, DBB, SAUR, SEN, MYCT, GON, RC | 99                                                                   | 98 – 99       | 1               | 0 – 1         | 0               | 0 – 1         | 0               | 0 – 1  |

**Supplementary Table S3.** Estimated proportional prey inputs from Bayesian isotope mixing model (MixSir) of trophic groups (TG) to diets of nine predator species and to diets of trophic groups as a whole (TG3-5). Values reported are for  $1 \times 10^7$  iterations and wasp-waist priors of [1 2 1 1]. Species and TGs marked in bold with an asterisk showed bimodal solutions. TG input estimate values that were bimodal for these species are shown in bold.

|                              |                                                           | Estimated proportional prey inputs<br>Informed priors [1 2 1 1] |                |                 |               |                 |               |                 |               |
|------------------------------|-----------------------------------------------------------|-----------------------------------------------------------------|----------------|-----------------|---------------|-----------------|---------------|-----------------|---------------|
|                              |                                                           | Trophic Group 2                                                 |                | Trophic Group 3 |               | Trophic Group 4 |               | Trophic Group 5 |               |
| Species                      | Code                                                      | Median                                                          | 95% CI         | Median          | 95% CI        | Median          | 95% CI        | Median          | 95% CI        |
| <i>S. japonicus</i>          | PM                                                        | 89                                                              | 82 – 95        | 6               | 2 – 14        | 2               | 0 – 7         | 2               | 0 – 5         |
| <i>P. glauca</i>             | BLSK                                                      | 73                                                              | 58 – 84        | 17              | 4 – 37        | 5               | 0 – 15        | 4               | 0 – 11        |
| <i>T. alalunga</i>           | ALB                                                       | 75                                                              | 71 – 79        | 9               | 3 – 20        | 14              | 6 – 19        | 1               | 0 – 4         |
| <i>T. orientalis</i>         | PB                                                        | 43                                                              | 37 – 50        | 30              | 19 – 41       | 17              | 6 – 28        | 10              | 2 – 18        |
| <i>T. albacares</i>          | YFT                                                       | 53                                                              | 49 – 58        | 3               | 1 – 8         | 41              | 31 – 46       | 2               | 0 – 9         |
| <b><i>S. chiliensis</i>*</b> | <b>BON</b>                                                | <b>15</b>                                                       | <b>2 – 41</b>  | <b>61</b>       | <b>6 – 84</b> | <b>21</b>       | <b>2 – 55</b> | 4               | 0 – 15        |
| <i>S. lalandi</i>            | YT                                                        | 3                                                               | 0 – 10         | 75              | 63 – 85       | 13              | 1 – 29        | 7               | 1 – 17        |
| <i>X. gladius</i>            | SWD                                                       | 1                                                               | 0 – 5          | 96              | 93 – 99       | 1               | 0 – 4         | 1               | 0 – 3         |
| <i>I. oxyrinchus</i>         | MAKO                                                      | 5                                                               | 0 – 14         | 85              | 72 – 94       | 5               | 0 – 16        | 4               | 0 – 12        |
| Trophic Group (TG)           |                                                           |                                                                 |                |                 |               |                 |               |                 |               |
| 5*                           | <b>MAKO, YT, SWD, BON, YFT, PB, STM, LOL, DG</b>          | <b>24</b>                                                       | <b>20 – 59</b> | <b>62</b>       | <b>5 – 68</b> | 4               | 0 – 14        | <b>9</b>        | <b>2 – 33</b> |
| 4                            | BLSK, ABRL, SLB, ALB, FM, OPA, PM, ONYC                   | 80                                                              | 75 – 85        | 14              | 5 – 22        | 4               | 0 – 10        | 2               | 0 – 5         |
| 3                            | SARD, EELPT, JM, SEB, ARGO, DBB, SAUR, SEN, MYCT, GON, RC | 99                                                              | 98 – 99        | 1               | 0 – 1         | 0               | 0 – 1         | 0               | 0 – 1         |
